# Supplementary material for: High-Carbohydrate Diet Consumption Poses a More Severe Liver Cholesterol Deposition than a High-Fat and High-Calorie Diet in Mice
Source: MDPI journal article supplement (doi:10.3390/ijms241914700), 2023-09-28
Supplement: s1 [file s1]

**Supplementary Materials :****Supplementary Table S1.** Dietary formulas.

|                             | <b>F-15</b> | <b>F-25</b> | <b>F-35</b> | <b>F-45</b> |
|-----------------------------|-------------|-------------|-------------|-------------|
| Casein, L-Cystine           | 237.20      | 251.20      | 267.00      | 284.90      |
| Dextrin                     | 316.60      | 281.90      | 242.80      | 198.60      |
| Sucrose                     | 283.00      | 249.00      | 210.70      | 167.30      |
| Soybean oil                 | 31.90       | 56.40       | 83.80       | 115.00      |
| Lard                        | 31.90       | 56.40       | 83.80       | 115.00      |
| Cellulose                   | 50.90       | 53.90       | 57.30       | 61.20       |
| Vitamins, minerals, choline | 48.40       | 51.20       | 54.40       | 58.10       |
| TBHQ                        | 0.01        | 0.02        | 0.03        | 0.05        |
| Total                       | 1000        | 1000        | 1000        | 1000        |
| Ingredient gm (kcal/g)      | 3.8         | 4.1         | 4.3         | 4.6         |
| Protein (kcal %)            | 22.2%       | 22.2%       | 22.2%       | 22.2%       |
| Carbohydrate (kcal %)       | 62.7%       | 52.7%       | 42.7%       | 32.7%       |
| Fat (kcal %)                | 15.0%       | 25.0%       | 35.0%       | 45.0%       |
| Total                       | 100%        | 100%        | 100%        | 100%        |

Note: 1 kg diet supplemented with 3.1 g alanine, 4.5 g arginine and 25.5 g glutamate, 2.3 g glycine, 9.2 g lysine, 3.3 g methionine, 2.4 g cystine, 1.6 g tryptophan, 14.3 g proline, 6.7 g serine, 3.3 g histidine, 10.9 g leucine, 5.9 g isoleucine, 6.6 g tyrosine, 6.2 g phenylalanine, 4.7 g threonine, 7 g valine, 8 g Aspartic acid, 5000 ppm calcium, 3000 ppm phosphorus, 1033 ppm sodium, 511 ppm magnesium, 45 ppm iron, 35 ppm zinc, 10 ppm fierce, 6 ppm copper, 0.2 ppm iodine, 1 ppm chromium, 300 ppm Inorganic sulfur, 1613 ppm chlorine, 4 IU Vitamin A, 1 IU Vitamin D, 0.86 ppm Vitamin K, 5 ppm Thiamine, B1, 6 ppm riboflavin, 30 ppm niacin, 15 ppm Pantothenic acid, 6 ppm Vitamin B6, 1000 ppm choline, 2 ppm Folic acid, 0.2 ppm biotin and 25ppb Vitamin B1.

**Supplementary Table S2.** Fatty acid composition of the oils.

| Composition         | Soybean oil   | Lard oil      | Blend oil |
|---------------------|---------------|---------------|-----------|
| C12:0, g/100g       | 0.0067        | 0.1655        | 0.0861    |
| C14:0, g/100g       | 0.0963        | 1.325         | 0.71065   |
| C16:0, g/100g       | 11.2237       | 23.3905       | 17.3071   |
| C17:0, g/100g       | 0.0514        | ( <0.000325 ) | 0.0257    |
| C18:0, g/100g       | 4.5769        | 12.8156       | 8.69625   |
| C20:0, g/100g       | 0.4093        | ( <0.000408 ) | 0.20465   |
| C22:0, g/100g       | 0.4974        | ( <0.000481 ) | 0.2487    |
| C16:1, g/100g       | 0.0764        | 1.631         | 0.8537    |
| C18:1n9c, g/100g    | 23.4902       | 39.1915       | 31.34085  |
| C20:1, g/100g       | 4.7844        | ( <0.000408 ) | 2.3922    |
| C22:1n9, g/100g     | 0.101         | ( <0.000500 ) | 0.0505    |
| C18:2n6c, g/100g    | 49.471        | 16.7741       | 33.12255  |
| C20:2, g/100g       | ( <0.000590 ) | 0.282         | 0.141     |
| C18:3n6, g/100g     | 0.432         | ( <0.000433 ) | 0.216     |
| EPA C20:5n3, g/100g | 0.4454        | ( <0.000766 ) | 0.2227    |

**Supplementary Table S3.** Primer sequences.

| Gene            | Primer sequences (5'-3')                               | Primer length (bp) | Gene ID        |
|-----------------|--------------------------------------------------------|--------------------|----------------|
| <i>β-actin</i>  | F: CATCCGTAAAGACCTCTATGCCAAC<br>R: ATGGAGCCACCGATCCACA | 171                | NM_007393.5    |
| <i>Srebp-1c</i> | F: TCGGGCTGTTGTCTACCATA<br>R: CCAGGTTGAGGGCACTTAGT     | 104                | NM_001358315   |
| <i>Pi3k</i>     | F: CCACGGTTTGGACTATGGAAG<br>R: AGTAGTGGGCTTGGGTGGTT    | 131                | NM_001024955.2 |
| <i>Akt</i>      | F: ATAACGGACTTCGGGCTGTG<br>R: TCGAACAGCTTCTCGTGGTC     | 209                | NM_001165894.2 |
| <i>Insig1</i>   | F: TTAGCAGCCCTCTCTTTGGG<br>R: ATCAGGGGACGTGTACTGGTAG   | 144                | NM_153526.5    |
| <i>Srebp2</i>   | F: ACCTCACGGGGGACTCTG<br>R: CTGGCTGAATGACCGCTGTA       | 293                | NM_033218.2    |
| <i>Asgr1</i>    | F: TTGCTGGTGGTTGTCTGTGT<br>R: ACTACTTCCCTGGGTGCTCA     | 138                | NM_009714.3    |
| <i>Lipin1</i>   | F: TGCTCGTGAATCCTCTTGGTTC<br>R: CGGGGTTCAGTCCCTTGTAG   | 100                | NM_172950.3    |
| <i>Ucp20</i>    | F: GTTGCGACGGCAGGTACT<br>R: GTGGGCATTCTCTTGGGACA       | 80                 | NM_028846.5    |
| <i>Ppara</i>    | F: TGGTGTTTCGCAGCTGTTTTG<br>R: AGATACGCCCAAATGCACCA    | 153                | XM_030248422.2 |
| <i>Cpt-1</i>    | F: AGCCAGACGAAGAACATC<br>R: CCTTGACCATAGCCATCC         | 172                | XM_036161417.1 |
| <i>mTorc1</i>   | F: CGCTACTGTGTCTTGGCATC<br>R: GTTCATGCTGCTTAGTCGGC     | 153                | NM_020009.2    |
| <i>Ampk</i>     | F: ACGATGAGGCTGTGAAGGAA<br>R: CTGATGGAGGACTAGAGGCG     | 180                | NM_001356568.1 |
| <i>Lxra</i>     | F: TCAAGGGAGCACGCTATGTCT<br>R: CCTCTTCTTGCCGCTTCAGT    | 174                | XM_006499168.4 |

| Gene          | Primer sequences (5'-3')                                | Primer length<br>(bp) | Gene ID        |
|---------------|---------------------------------------------------------|-----------------------|----------------|
| <i>Fxr</i>    | F: GCTTGATGTGCTACAAAAGCTG<br>R: CGTGGTGATGGTTGAATGTCC   | 110                   | NM_001385711.1 |
| <i>Hmgcr</i>  | F: CCCGTCGTGACCTCAAAGAA<br>R: CAGAAGCCCCAAGCACAAAC      | 193                   | NM_001360165.1 |
| <i>Cyp7a1</i> | F: GGGATTGCTGTGGTAGTGAGC<br>R: GGTATGGAATCAACCCGTTGTC   | 100                   | NM_007824.3    |
| <i>Acat1</i>  | F: CGGCTGTCAAAATCTGGGGA<br>R: AGTGGCACCCAACTTCCTTC      | 195                   | NM_009230.3    |
| <i>Ldlr</i>   | F: AGAAGACTCATGCAGCAGGAAC<br>R: TGCATGTCTCTGGGGACTCA    | 122                   | NM_001252659.1 |
| <i>Psck9</i>  | F: AACAGCTACAGCTACAGCCC<br>R: CGGGAAGGACATCATCGGAG      | 38                    | XM_006498747.2 |
| <i>Apob</i>   | F: TGGCTCTGATCCCAAATCCCT<br>R: CCGTGCATTTCATTGTTCGATCTG | 195                   | NM_009693.2    |
| <i>Abcg8</i>  | F: CTGTGGAATGGGACTGTACTTC<br>R: TGTTGTCACTTTCCGAGGAGA   | 76                    | NM_026180.3    |
| <i>Abcg5</i>  | F: CCTGCTGAGGCGAGTAACAA<br>R: TGGCACCCACAAGCTGATAG      | 179                   | NM_031884.2    |
| <i>Lact</i>   | F: CCGTGGCTGCACTCTATGAA<br>R: CATGGGCAGCAAATGTACGG      | 110                   | NM_008490.2    |
| <i>Fabp2</i>  | F: GCATGTGAGGCGGTTAGGTT<br>R: GAGGTCCAGTCCTGTCCACT      | 113                   | NM_007980.3    |
| <i>Cd36</i>   | F: AGATGACGTGGCAAAGAACAG<br>R: CCTTGGCTAGATAACGAACTCTG  | 188                   | NM_001159558.1 |
| <i>Fatp4</i>  | F: TGCTCCTGTACTTGGGGTCT<br>R: AATCAGGGCTGTCTTGTCCG      | 194                   | NM_011989.5    |
| <i>Npc1l1</i> | F: TGGACATACGCTCAGGCATC<br>R: ATGTGGGACACGAACTCCAC      | 157                   | NM_207242.2    |
| <i>Abcal</i>  | F: GCCGTCTTTCCAGGACAGTATG<br>R: CAGGGTGGCTCTTCTCATCAAT  | 100                   | NM_013454.3    |

| Gene                          | Primer sequences (5'-3')                                 | Primer length<br>(bp) | Gene ID        |
|-------------------------------|----------------------------------------------------------|-----------------------|----------------|
| <i>Acat2</i>                  | F: GGGATTTCGGCTTCTGTTACGA<br>R: CAGCTGGAATACCTACCCAC     | 172                   | NM_009338.3    |
| <i>Apoa1</i>                  | F: TGA CTCGGGACTTCTGGGAT<br>R: GGAATTCGTCCAGGTAGGGC      | 114                   | NM_009692.4    |
| <i>ApoCIII</i>                | F: GTCCCCTGTCTTTTCCTGTCT<br>R: TCCCTCTACCTCTTCAGCTCG     | 125                   | NM_001289756.1 |
| <i>Il-1<math>\beta</math></i> | F: GCAACTGTTTCCTGAACTCAACT<br>R: ATCTTTTGGGGTCCGTCAACT   | 89                    | NM_008361.4    |
| <i>Il-6</i>                   | F: TGATGGATGCTACCAAACCTGGA<br>R: TGTGACTCCAGCTTATCTCTTGG | 197                   | NM_001314054.1 |
| <i>Tnfa</i>                   | F: CCCTCACACTCAGATCATCTTCT<br>R: GCTACGACGTGGGCTACAG     | 61                    | NM_013693.3    |
| <i>Col4a1</i>                 | F: CACCCATCTCTGGGGACAAC<br>R: GTTAGGGCACTGCGGAATCT       | 116                   | NM_009931.2    |
| <i>Adamts1</i>                | F: GGGGAGACTGCTCAAGAACC<br>R: ACCTGTAGCGGACTCGTTTG       | 117                   | NM_009621.5    |

### Supplementary Method S1. Liver total cholesterol and triglyceride content analysis.

- 1). Sample preparation: 0.1 g liver tissues were weighed accurately with an analytical balance, add 9 times volume of normal saline, ground at 60 Hz for 1 min at 4°C to prepare 10% homogenate, centrifuged at 3000 r/min and 4°C for 10 min, and the supernatant was aspirated for testing.
- 2) Determination of protein content. The concentration of total protein in each set of samples was tested according to the BCA kit instructions. The procedure is as follows.

|                             | Blank well | Standard well | Assay well |
|-----------------------------|------------|---------------|------------|
| Double distilled water (μL) | 10         | -             | -          |
| 563 μg/mL Standard (μL)     | -          | 10            | -          |
| Samples to be tested (μL)   | -          | -             | 10         |
| Working solution (μL)       | 250        | 250           | 250        |

Mix well, incubate at 37°C for 30 minutes at 562 nm, and measure the absorbance of each well by microplate reader.

Microplate reader colorimetric calculation formula: Total protein concentration (μg/mL) = (measured OD value - blank OD value) / (standard OD value - blank OD value) \* calibrator concentration (524 μg/mL) \* dilution factor before sample test

- 3) Determination of total cholesterol. According to the TC kit instructions, the content of cholesterol in mouse liver tissue was detected. The operation steps are as follows:

|                             | Blank well | Standard well | Assay well |
|-----------------------------|------------|---------------|------------|
| Double distilled water (μL) | 2.5        | -             | -          |
| Standard (μL)               | -          | 2.5           | -          |
| Samples to be tested (μL)   | -          | -             | 2.5        |
| Working solution (μL)       | 250        | 250           | 250        |

Mix well, incubate at 37°C for 10 minutes at 510 nm, and measure the absorbance of each well by microplate reader.

Microplate reader colorimetric calculation formula: Total cholesterol content (mmol/gprot) = (sample OD value - blank OD value) / (standard OD value - blank OD value) \* calibrator

concentration (mmol/L) / protein concentration of sample to be tested (gprot/L)

4) Triglyceride determination. According to the instructions of TG kit, the content of triglyceride in liver tissue of mice was detected. The operation steps are as follows:

|                             | Blank well | Standard well | Assay well |
|-----------------------------|------------|---------------|------------|
| Double distilled water (μL) | 2.5        | -             | -          |
| Standard (μL)               | -          | 2.5           | -          |
| Samples to be tested (μL)   | -          | -             | 2.5        |
| Working solution (μL)       | 250        | 250           | 250        |

Mix well, incubate at 37°C for 10 minutes at 510 nm, and measure the absorbance of each well by microplate reader.

Microplate reader colorimetric calculation formula: Triglyceride content (mmol/gprot) = (sample OD value - blank OD value) / (standard OD value - blank OD value) \* calibrator concentration (mmol/L) / protein concentration of the sample to be tested (gprot/L)

5) Accuracy:

a. the absorbance of the reagent blank tube was  $\leq 0.100$ .

b. linearity:  $r^2 > 0.995$  in the range of 0 to 19.39 mmol/L.

c. precision:  $CV \leq 3\%$  and inter-assay relative range  $\leq 5\%$ .

6) Each set of 15 replicates was tested three times, and the trends of the analysis results were consistent for the three times.
